# Supplementary material for: Transforming Growth Factor-Beta 1 Induces Neutrophil Apoptosis in Colorectal Cancer Liver Metastases
Source: Preprints.org preprint supplement (doi:10.20944/preprints202305.0396.v1), 2023-05-06
Supplement: Supplementary file 1 [file supplementary]

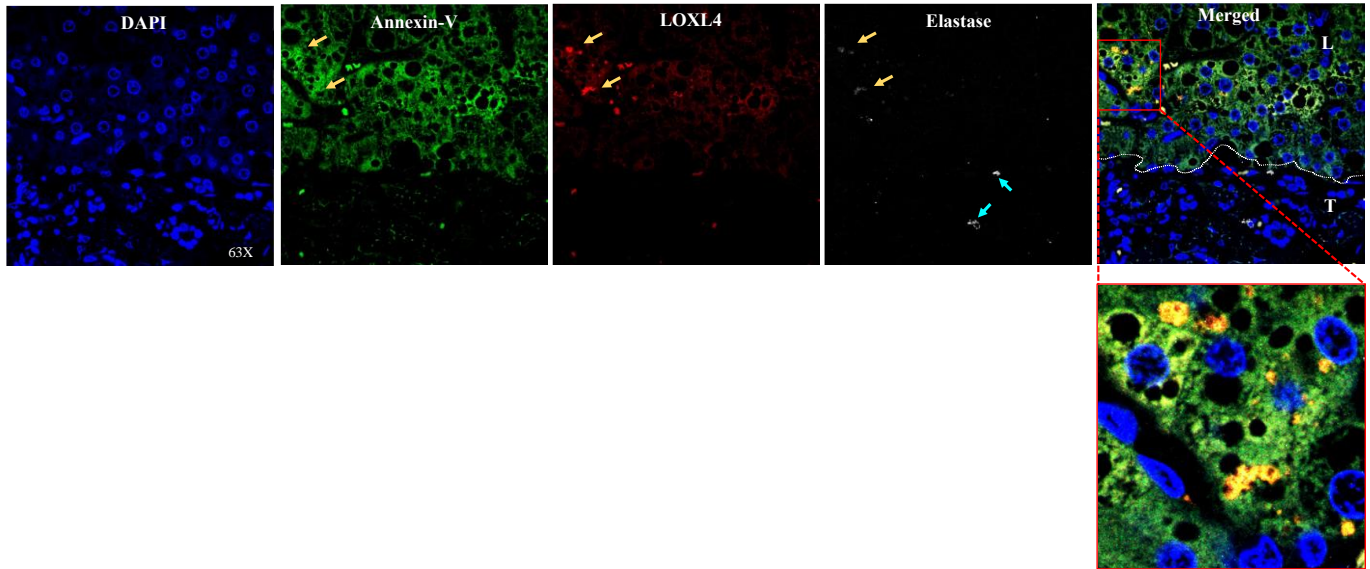

**Supplementary Figure S1. Apoptotic neutrophils express LOXL4.** Immunofluorescence staining of chemonaïve CRCLM specimens showing annexin-v (green), LOXL4 (red), and elastase (white). T: Tumour; L: Liver parenchyma; D: Desmoplastic ring.
